# Supplementary material
Source: MDPI journal article supplement (https://www.mdpi.com/2073-4433/13/7/1043)
Supplement: s1 [file s1]

# Improving the Performance of Pipeline Leak Detection Algorithms for the Mobile Monitoring of Methane Leaks

Tian Xia \*, Julia Raneses and Stuart Batterman

Department of Environmental Health Sciences, School of Public Health, University of Michigan, Ann Arbor, MI, 48109, USA; jraneses@umich.edu (J.R.); stuartb@umich.edu (S.B.)  
\* Correspondence: xiatian@umich.edu

**Table S1.** Statistics of the 254 peaks detected by our algorithm with parameter set 4 setups on the second 10-day subset. Bolded data represents the median.

|                    |              | C <sub>B</sub> (ppm) | ΔC <sub>max</sub> (ppm) | ΔC <sub>ave</sub> (ppm) | ΔC <sub>med</sub> (ppm) |
|--------------------|--------------|----------------------|-------------------------|-------------------------|-------------------------|
| Valid Sample Size  |              | 254                  | 254                     | 254                     | 254                     |
| Average            |              | 2.03                 | 1.26                    | 0.44                    | 0.31                    |
| Standard Deviation |              | 0.05                 | 3.28                    | 0.79                    | 0.45                    |
| Percentile         | 0.000        | 1.93                 | 0.07                    | 0.05                    | 0.02                    |
|                    | 0.250        | 1.99                 | 0.14                    | 0.12                    | 0.12                    |
|                    | <b>0.500</b> | <b>2.02</b>          | <b>0.26</b>             | <b>0.19</b>             | <b>0.18</b>             |
|                    | 0.750        | 2.08                 | 0.72                    | 0.35                    | 0.31                    |
|                    | 0.900        | 2.11                 | 2.62                    | 0.95                    | 0.63                    |
|                    | 0.980        | 2.14                 | 10.74                   | 3.28                    | 1.51                    |
|                    | 0.990        | 2.15                 | 15.35                   | 3.90                    | 1.80                    |
|                    | 0.999        | 2.17                 | 29.44                   | 6.68                    | 4.66                    |
|                    | 1.000        | 2.17                 | 31.59                   | 7.30                    | 5.57                    |

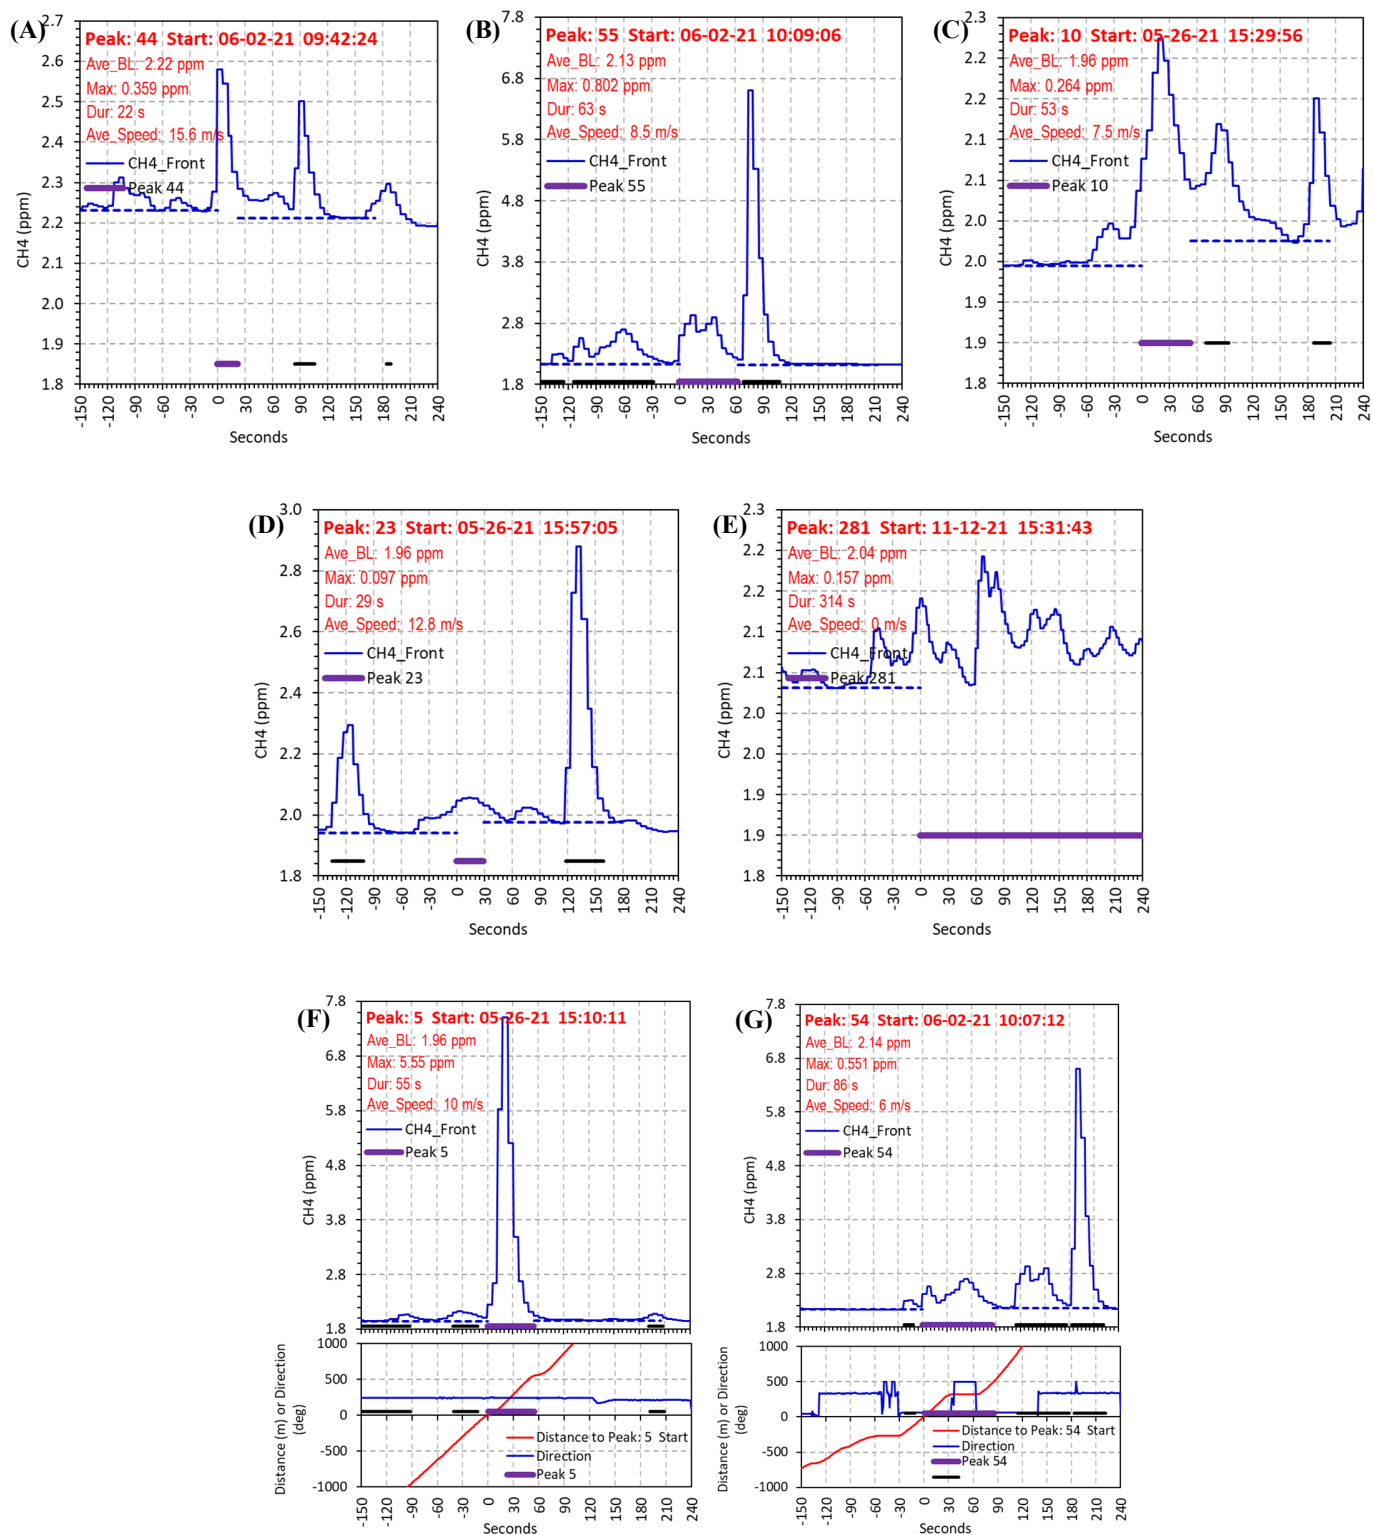

**Figure S1.** Graphical examples of flagged peaks. (A) Baseline (start) out of range (1.8 – 2.2 ppm); (B) consistently elevated observations in the baseline window (>50% of data in the baseline window as indicated by the blue dashed line); (C) large baseline shifts ( $|C_{B,pre} - C_{B,post}| > 0.02$  ppm); (D) small peak ( $\Delta C_{max} < 0.1$  ppm); (E) peak duration too long ( $t_p > 240$  s); (F) wide peaks ( $W > 500$  m); (G) peaks with stopped periods ( $V_i < 0.05$  m/s exceeding 1 s during the peak, as indicated by 500 deg driving direction).

### A) Number of Peaks after Pass 2

|                     |         | $R_{\text{thresh}}$ |       |      |     |
|---------------------|---------|---------------------|-------|------|-----|
|                     |         | 1.015               | 1.025 | 1.05 | 1.1 |
| $t_{\text{window}}$ | 100     | 588                 | 481   | 357  | 224 |
|                     | 150     | 559                 | 474   | 349  | 222 |
|                     | (s) 300 | 495                 | 436   | 352  | 213 |
|                     | 450     | 462                 | 384   | 327  | 203 |
|                     | 600     | 438                 | 364   | 304  | 196 |

$p = 0.01$

|                     |         | $R_{\text{thresh}}$ |       |      |     |
|---------------------|---------|---------------------|-------|------|-----|
|                     |         | 1.015               | 1.025 | 1.05 | 1.1 |
| $t_{\text{window}}$ | 100     | 584                 | 494   | 353  | 224 |
|                     | 150     | 561                 | 464   | 350  | 222 |
|                     | (s) 300 | 507                 | 438   | 337  | 214 |
|                     | 450     | 461                 | 386   | 319  | 202 |
|                     | 600     | 417                 | 365   | 296  | 193 |

$p = 0.05$

|                     |         | $R_{\text{thresh}}$ |       |      |     |
|---------------------|---------|---------------------|-------|------|-----|
|                     |         | 1.015               | 1.025 | 1.05 | 1.1 |
| $t_{\text{window}}$ | 100     | 589                 | 482   | 332  | 227 |
|                     | 150     | 556                 | 467   | 334  | 223 |
|                     | (s) 300 | 506                 | 421   | 312  | 210 |
|                     | 450     | 444                 | 398   | 303  | 202 |
|                     | 600     | 419                 | 370   | 290  | 188 |

$p = 0.15$

|                     |         | $R_{\text{thresh}}$ |       |      |     |
|---------------------|---------|---------------------|-------|------|-----|
|                     |         | 1.015               | 1.025 | 1.05 | 1.1 |
| $t_{\text{window}}$ | 100     | 570                 | 478   | 326  | 220 |
|                     | 150     | 564                 | 473   | 317  | 219 |
|                     | (s) 300 | 512                 | 417   | 295  | 205 |
|                     | 450     | 446                 | 391   | 286  | 192 |
|                     | 600     | 408                 | 370   | 275  | 183 |

$p = 0.25$

|                     |         | $R_{\text{thresh}}$ |       |      |     |
|---------------------|---------|---------------------|-------|------|-----|
|                     |         | 1.015               | 1.025 | 1.05 | 1.1 |
| $t_{\text{window}}$ | 100     | 520                 | 416   | 285  | 196 |
|                     | 150     | 515                 | 417   | 283  | 206 |
|                     | (s) 300 | 471                 | 381   | 284  | 198 |
|                     | 450     | 438                 | 355   | 270  | 190 |
|                     | 600     | 406                 | 337   | 254  | 178 |

$p = 0.5$

### B) Baseline out of Range

|                     |         | $R_{\text{thresh}}$ |       |      |      |
|---------------------|---------|---------------------|-------|------|------|
|                     |         | 1.015               | 1.025 | 1.05 | 1.1  |
| $t_{\text{window}}$ | 100     | 2.7%                | 2.7%  | 3.4% | 3.6% |
|                     | 150     | 1.4%                | 1.5%  | 2.0% | 2.3% |
|                     | (s) 300 | 0.8%                | 0.5%  | 0.3% | 0.5% |
|                     | 450     | 0.0%                | 0.0%  | 0.0% | 0.0% |
|                     | 600     | 0.0%                | 0.0%  | 0.0% | 0.0% |

$p = 0.01$

|                     |         | $R_{\text{thresh}}$ |       |      |      |
|---------------------|---------|---------------------|-------|------|------|
|                     |         | 1.015               | 1.025 | 1.05 | 1.1  |
| $t_{\text{window}}$ | 100     | 3.4%                | 4.0%  | 3.7% | 4.0% |
|                     | 150     | 2.0%                | 2.6%  | 2.3% | 2.7% |
|                     | (s) 300 | 0.8%                | 0.9%  | 0.6% | 0.5% |
|                     | 450     | 0.2%                | 0.0%  | 0.0% | 0.0% |
|                     | 600     | 0.0%                | 0.0%  | 0.0% | 0.0% |

$p = 0.05$

|                     |         | $R_{\text{thresh}}$ |       |      |      |
|---------------------|---------|---------------------|-------|------|------|
|                     |         | 1.015               | 1.025 | 1.05 | 1.1  |
| $t_{\text{window}}$ | 100     | 5.6%                | 7.3%  | 7.2% | 8.4% |
|                     | 150     | 4.5%                | 4.7%  | 4.5% | 4.0% |
|                     | (s) 300 | 2.0%                | 1.9%  | 1.3% | 1.0% |
|                     | 450     | 1.1%                | 0.8%  | 0.7% | 1.0% |
|                     | 600     | 0.7%                | 0.5%  | 0.3% | 0.5% |

$p = 0.15$

|                     |         | $R_{\text{thresh}}$ |       |      |       |
|---------------------|---------|---------------------|-------|------|-------|
|                     |         | 1.015               | 1.025 | 1.05 | 1.1   |
| $t_{\text{window}}$ | 100     | 7.2%                | 8.4%  | 8.9% | 11.8% |
|                     | 150     | 6.0%                | 6.6%  | 7.9% | 8.2%  |
|                     | (s) 300 | 3.1%                | 3.6%  | 2.7% | 2.0%  |
|                     | 450     | 2.7%                | 2.8%  | 1.7% | 2.6%  |
|                     | 600     | 2.2%                | 1.9%  | 1.1% | 1.6%  |

$p = 0.25$

|                     |         | $R_{\text{thresh}}$ |       |       |       |
|---------------------|---------|---------------------|-------|-------|-------|
|                     |         | 1.015               | 1.025 | 1.05  | 1.1   |
| $t_{\text{window}}$ | 100     | 18.8%               | 21.6% | 24.2% | 28.1% |
|                     | 150     | 15.3%               | 17.3% | 20.5% | 22.3% |
|                     | (s) 300 | 11.5%               | 12.3% | 14.1% | 14.6% |
|                     | 450     | 9.1%                | 9.6%  | 10.0% | 12.6% |
|                     | 600     | 9.1%                | 9.2%  | 10.2% | 12.4% |

$p = 0.5$

### C) Consistently elevated observations in baseline window

|                     |         | $R_{\text{thresh}}$ |       |       |      |
|---------------------|---------|---------------------|-------|-------|------|
|                     |         | 1.015               | 1.025 | 1.05  | 1.1  |
| $t_{\text{window}}$ | 100     | 39.5%               | 30.8% | 17.9% | 8.9% |
|                     | 150     | 39.4%               | 26.2% | 11.5% | 4.1% |
|                     | (s) 300 | 34.5%               | 25.7% | 8.0%  | 2.8% |
|                     | 450     | 35.5%               | 21.9% | 4.6%  | 3.9% |
|                     | 600     | 30.6%               | 19.5% | 7.6%  | 5.1% |

$p = 0.01$

|                     |         | $R_{\text{thresh}}$ |       |       |      |
|---------------------|---------|---------------------|-------|-------|------|
|                     |         | 1.015               | 1.025 | 1.05  | 1.1  |
| $t_{\text{window}}$ | 100     | 38.7%               | 27.7% | 17.6% | 8.0% |
|                     | 150     | 35.1%               | 23.7% | 9.1%  | 4.5% |
|                     | (s) 300 | 33.5%               | 22.4% | 7.4%  | 2.3% |
|                     | 450     | 31.7%               | 20.2% | 5.0%  | 4.0% |
|                     | 600     | 27.6%               | 16.4% | 2.7%  | 5.2% |

$p = 0.05$

|                     |         | $R_{\text{thresh}}$ |       |       |      |
|---------------------|---------|---------------------|-------|-------|------|
|                     |         | 1.015               | 1.025 | 1.05  | 1.1  |
| $t_{\text{window}}$ | 100     | 32.9%               | 22.6% | 14.2% | 8.4% |
|                     | 150     | 31.5%               | 17.8% | 8.7%  | 5.4% |
|                     | (s) 300 | 27.1%               | 14.7% | 4.8%  | 2.4% |
|                     | 450     | 25.7%               | 13.3% | 3.6%  | 1.5% |
|                     | 600     | 22.2%               | 13.0% | 3.4%  | 3.2% |

$p = 0.15$

|                     |         | $R_{\text{thresh}}$ |       |      |      |
|---------------------|---------|---------------------|-------|------|------|
|                     |         | 1.015               | 1.025 | 1.05 | 1.1  |
| $t_{\text{window}}$ | 100     | 26.0%               | 19.0% | 9.5% | 6.8% |
|                     | 150     | 25.7%               | 14.2% | 8.5% | 4.1% |
|                     | (s) 300 | 20.5%               | 8.6%  | 3.1% | 3.9% |
|                     | 450     | 16.4%               | 7.7%  | 2.8% | 1.6% |
|                     | 600     | 16.2%               | 6.8%  | 2.9% | 1.6% |

$p = 0.25$

|                     |         | $R_{\text{thresh}}$ |       |      |      |
|---------------------|---------|---------------------|-------|------|------|
|                     |         | 1.015               | 1.025 | 1.05 | 1.1  |
| $t_{\text{window}}$ | 100     | 4.4%                | 2.2%  | 1.4% | 0.0% |
|                     | 150     | 3.9%                | 2.4%  | 1.4% | 0.5% |
|                     | (s) 300 | 2.1%                | 1.0%  | 0.0% | 0.0% |
|                     | 450     | 2.3%                | 0.8%  | 0.7% | 1.1% |
|                     | 600     | 1.2%                | 1.2%  | 0.8% | 0.6% |

$p = 0.5$

#### D) Baseline shift

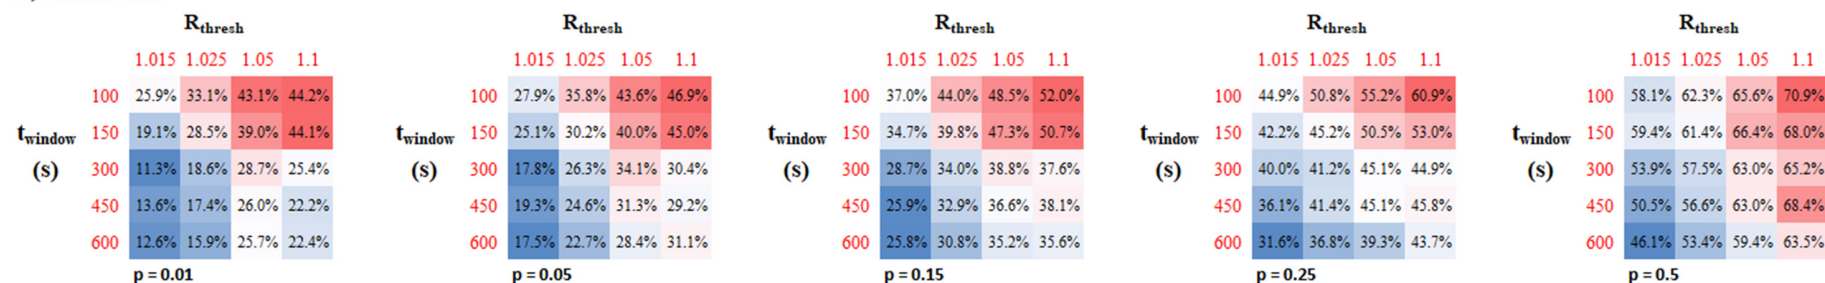

#### E) Sum of flagged peaks in B) - D)

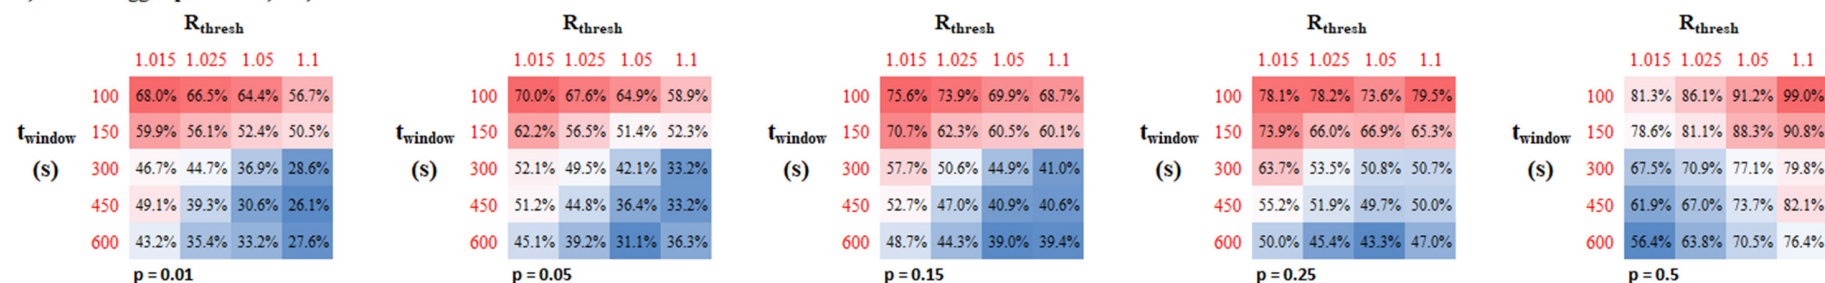

Figure S2. Heatmaps for the baseline sensitivity analyses.

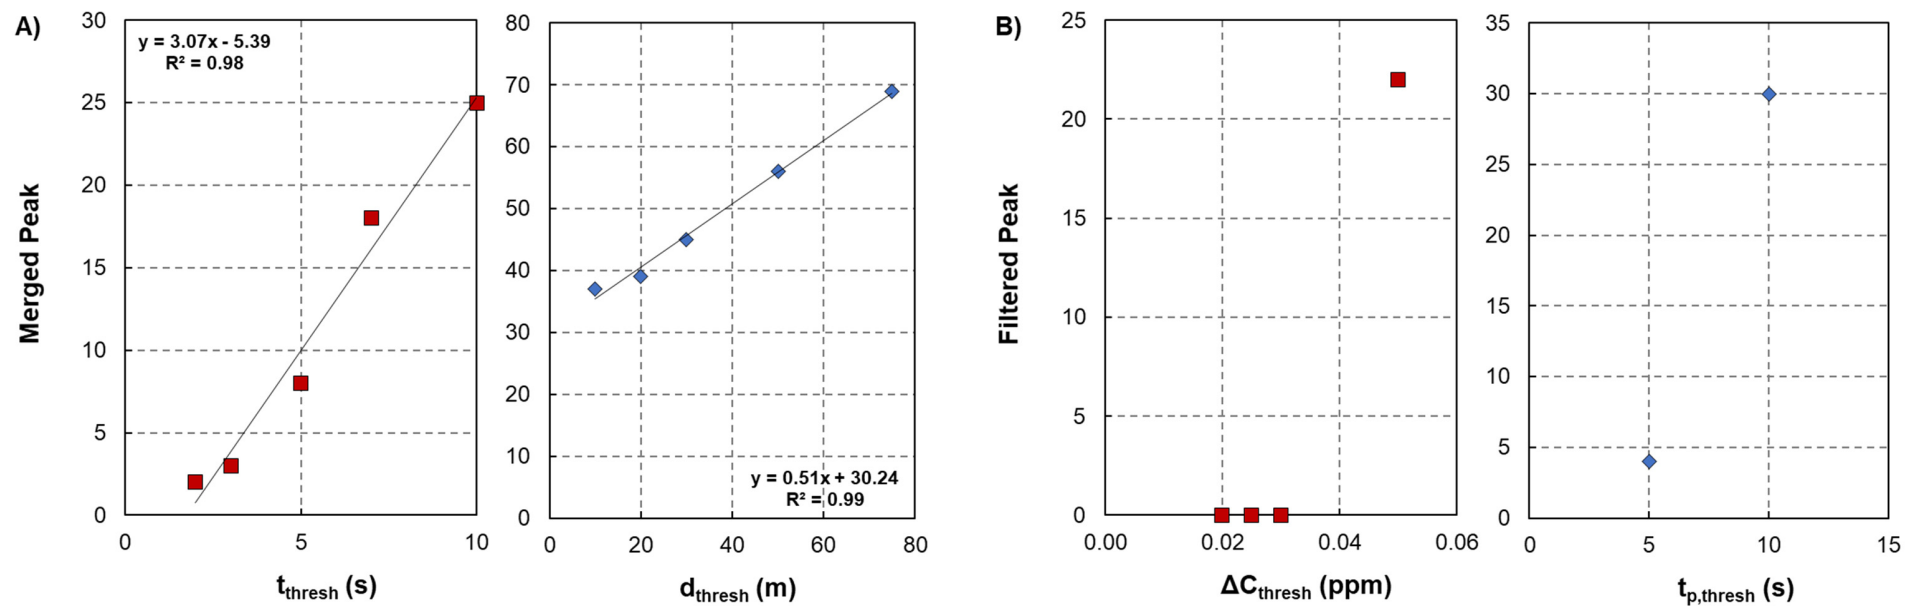

**Figure S3.** Number of A) merged peaks in Pass 3 and B) filtered out peaks in Pass 4 with different parameter setups.

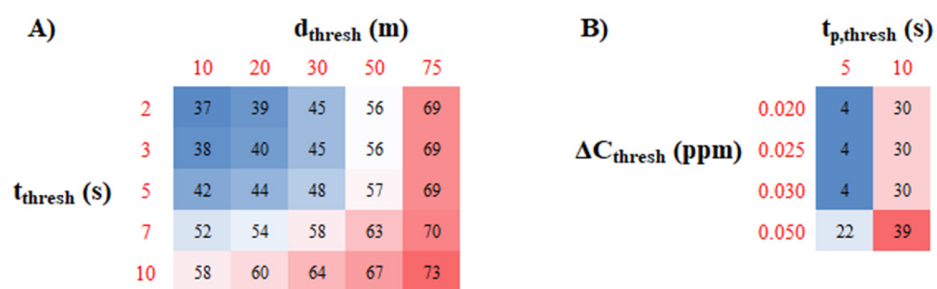

**Figure S4.** Heatmaps of the A) total merged peaks in Pass 3 with 25  $t_{\text{thresh}}$  and  $d_{\text{thresh}}$  combinations and B) total filtered out peaks in Pass 4 with 8  $t_{p,\text{thresh}}$  and  $\Delta C_{\text{thresh}}$  combinations.

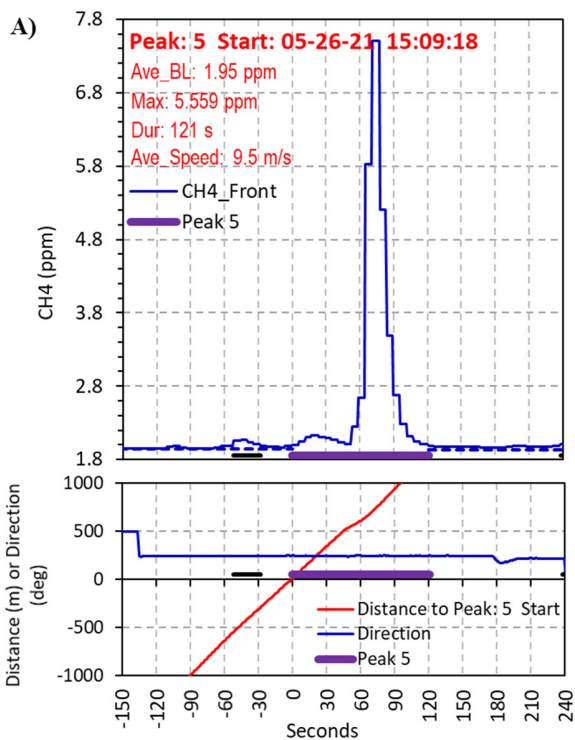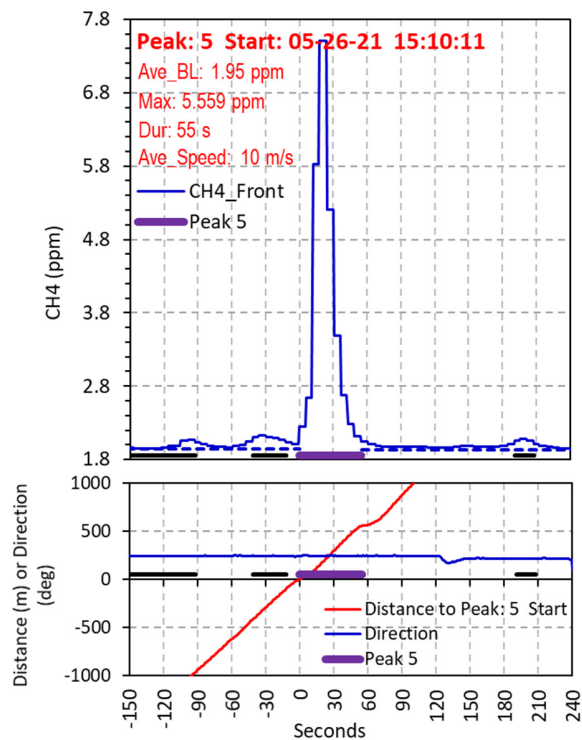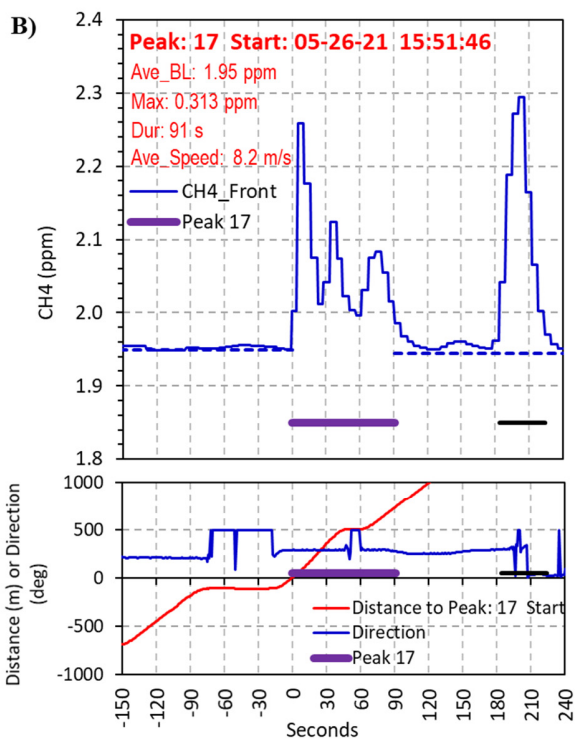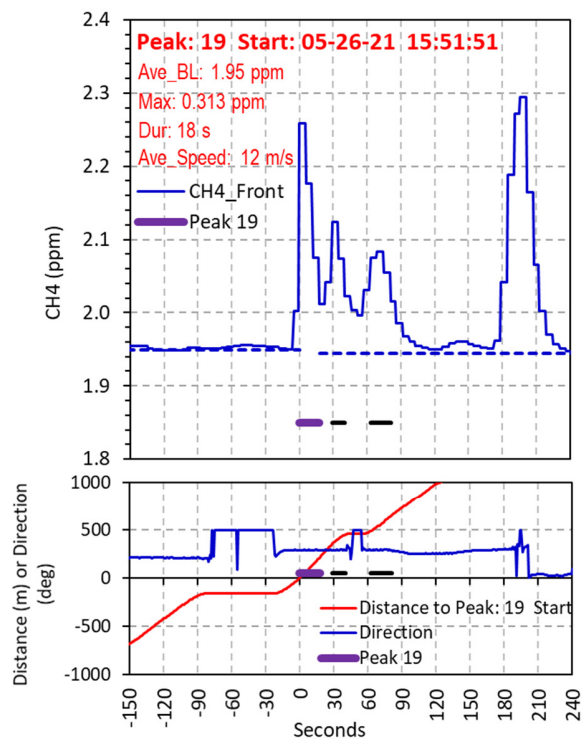



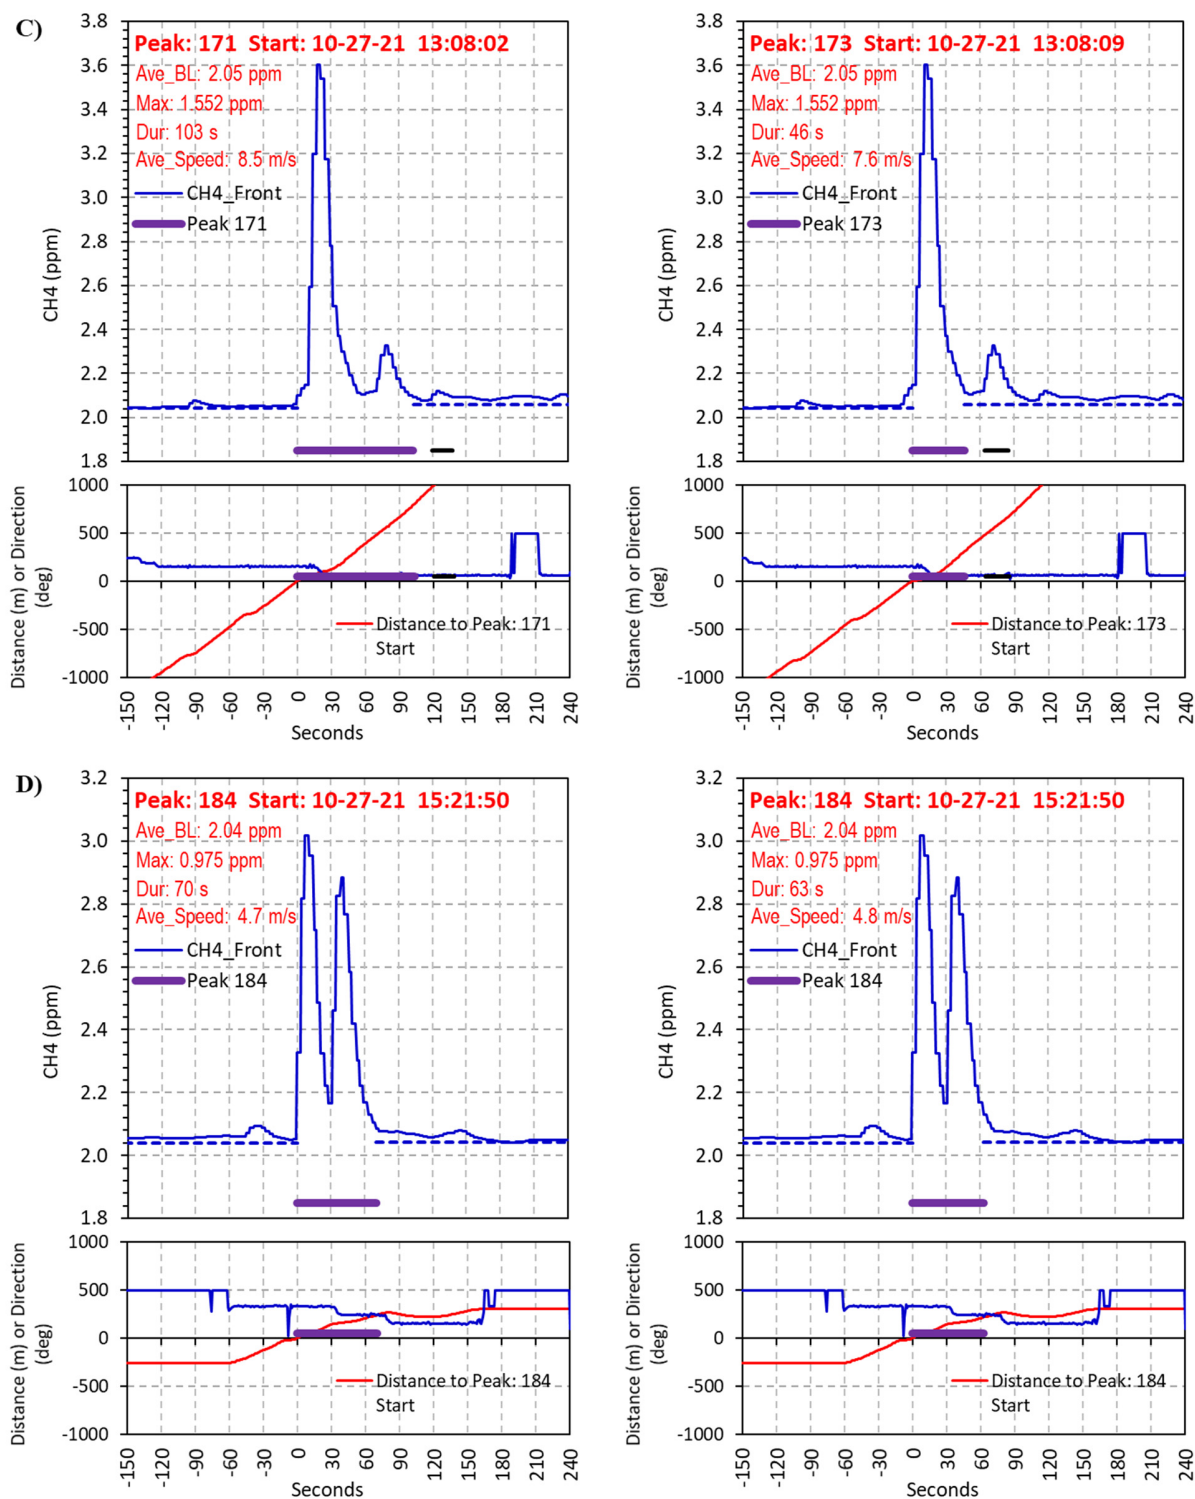

**Figure S5.** Comparison of selected peaks plots with  $R_{\text{thresh}} = 1.025$  (left) and  $R_{\text{thresh}} = 1.05$  (right). Fixed  $t_{\text{window}} = 450$  s and  $p = 0.05$  were applied. Solid bars under the trend plot indicate each peak detected, and dashed bars indicate pre- and post- peak baseline levels. The moving direction was set to 500 degrees if MPAL stopped.



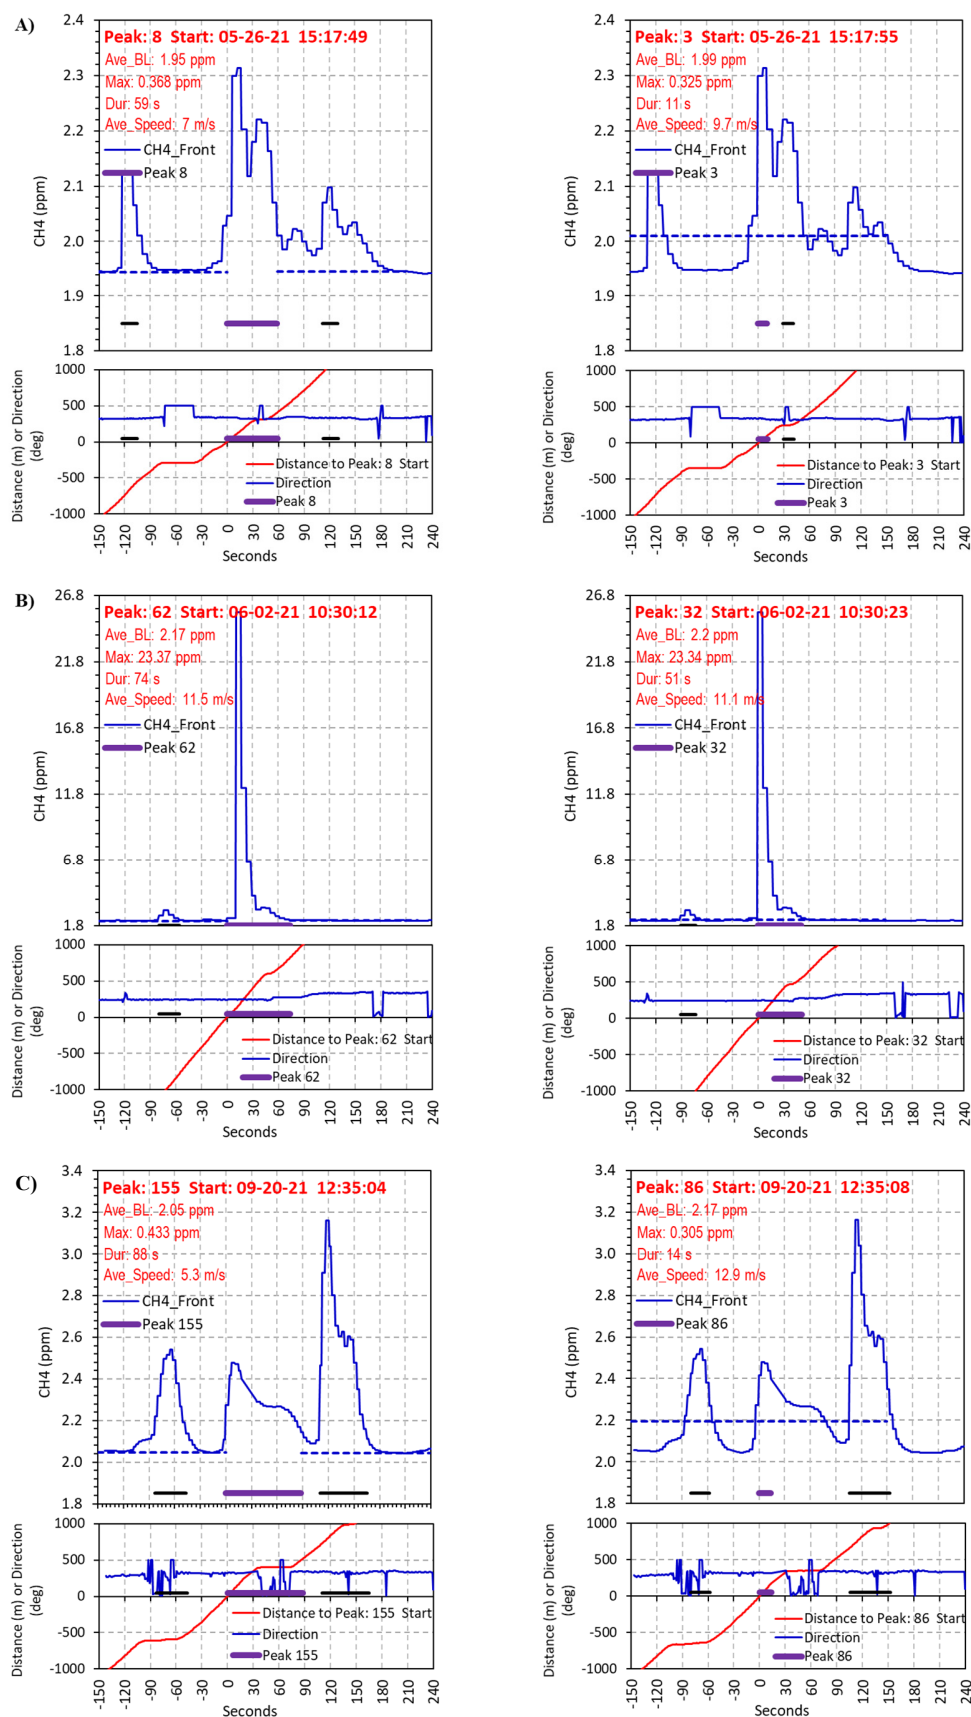

**Figure S6.** Comparison of selected peaks plots between parameter set 4 (left) and the parameters by Weller et al. [21] (right). Solid bars under the trend plot indicate each peak, dashed bars indicate peak baseline levels estimated using the corresponding method. The moving direction was set to 500 degrees if MPAL stopped.

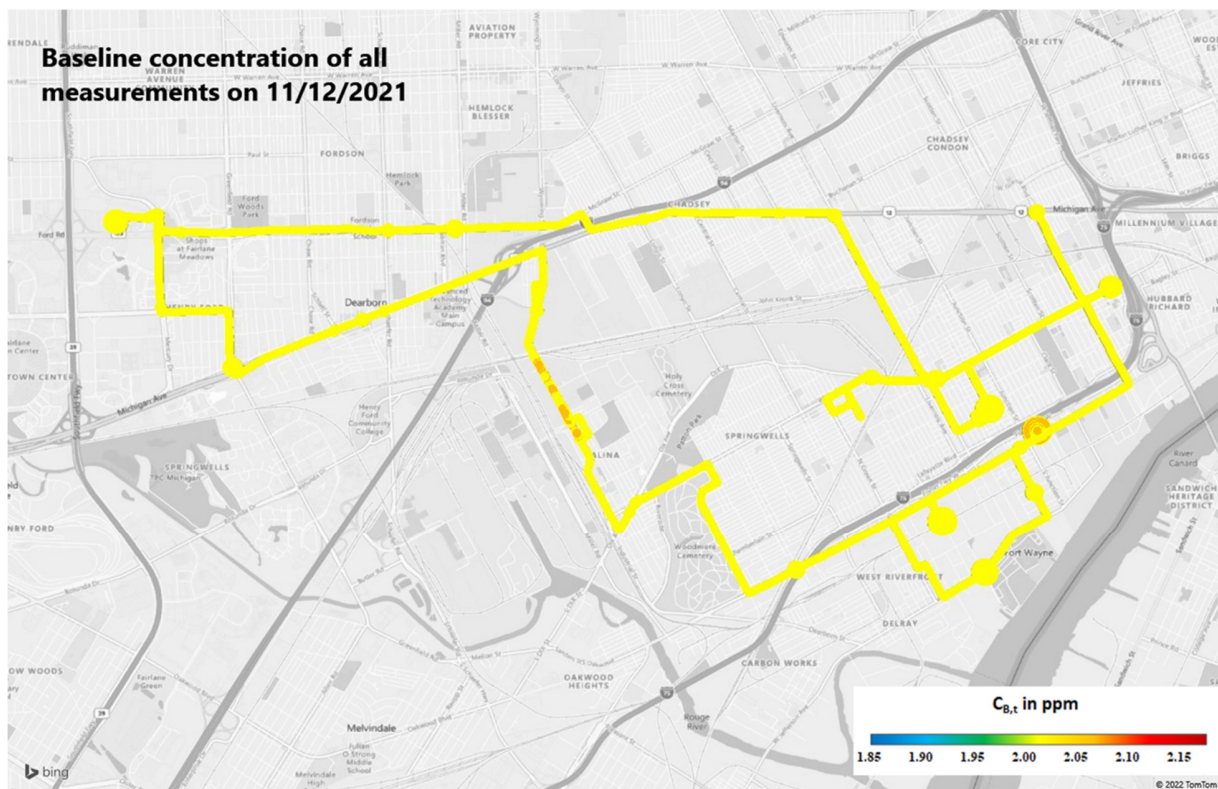

**Figure S7.** Map of  $C_{B,t}$  for all measurements on 11/12/2021. The size of the dot indicates the number of measurements at the same location. No obvious spatial variations are found. Background  $CH_4$  concentration was around 2 ppm and was only elevated by  $\sim 0.05$  ppm at two spots.

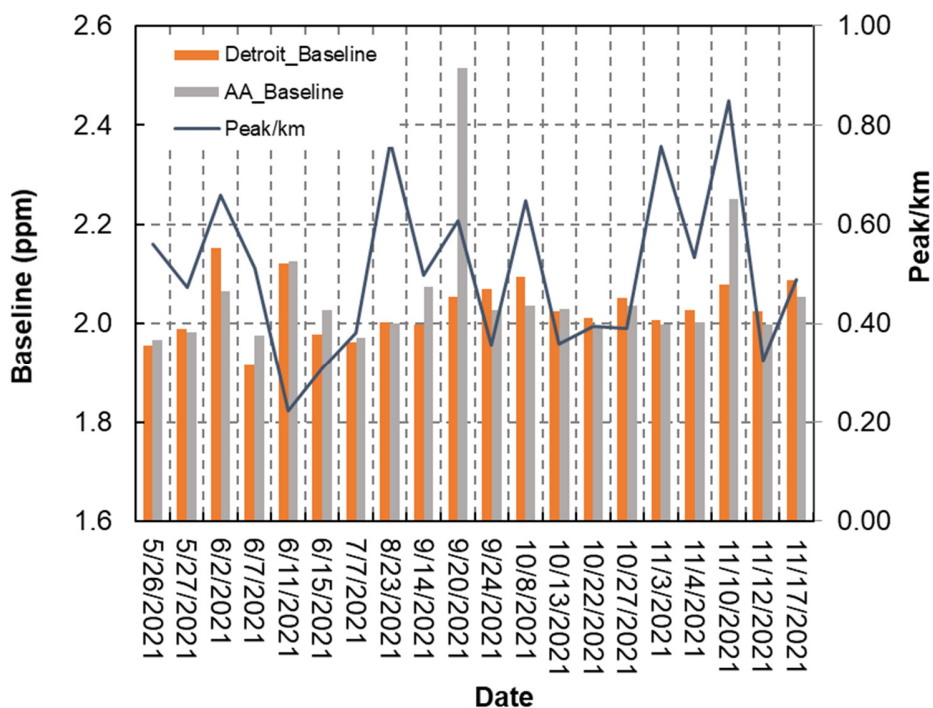

**Figure S8.** Median  $C_{B,t}$  (columns) of all measurements on each of the analyzed 20 days, which showed temporal background variations. The number of peaks per kilometer traveled on each day (line) was relatively unaffected by the median baseline concentration.
